# Supplementary material for: Designing and Validation of a Droplet Digital PCR Procedure for Diagnosis and Accurate Quantification of Nervous Necrosis Virus
Source: Preprints.org preprint supplement (doi:10.20944/preprints202308.0284.v1), 2023-08-03
Supplement: Supplementary file 1 [file supplementary]

Supplementary Table 1.- Results obtained with ddPCR applied on SJ pDNA – Repeat 1

|  |  |  |  |  |  | |  | | | |  | | | Replica5 | | | |  | | | |  | | | | | | | | | | | |
| --- | --- | --- | --- | --- | --- | --- | --- | --- | --- | --- | --- | --- | --- | --- | --- | --- | --- | --- | --- | --- | --- | --- | --- | --- | --- | --- | --- | --- | --- | --- | --- | --- | --- |
| Dil1 | ng/µl2 |  | ng pDNA/rctn**3** | | |  | | | cps/react4 |  | | | 1 | | 2 | 3 |  | | Avrg 6 | | | | Dev7 | | | | CV8 | | | | |
| -4 | 4.5 x 10-3 |  | 9.0 x 10-3 | (9.0 pg) |  | | | 2.19 x 106 | | |  | | | NT | NT | NT |  | | ND | | | | | ND | | | | ND | | | | |
| -5 | 4.5 x 10-4 |  | 9.0 x 10-4 | (0.90 pg) |  | | | 2.19 x 105 | | |  | | | ND | ND | ND |  | | - | | | | | - | | | | | - | | | | | |
| -6 | 4.5 x 10-5 |  | 9.0 x 10-5 | (90.0 fg) |  | | | 2.19 x 104 | | |  | | | 4720 | 4700 | ND |  | | 4710.0 | | | | | 14.14 | | | | | 0.3 | | | | | |
| -7 | 4.5 x 10-6 |  | 9.0 x 10-6 | (9.0 fg) |  | | | 2.19 x 103 | | |  | | | 718 | 1060 | ND |  | | 889.0 | | | | | 221.83 | | | | | 24.95 | | | | | |
| -8 | 4.5 x 10-7 |  | 9.0 x 10-7 | (0.90 fg) |  | | | 2.19 x 102 | | |  | | | 108.0 | 108.0 | 120.0 |  | | 112.0 | | | | | 6.92 | | | | | 6.19 | | | | | |
| -9 | 4.5 x 10-8 |  | 9.0 x 10-8 | (90.0 ag) |  | | | 2.19 x 101 | | |  | | | 30.0 | 20.0 | 20.0 |  | | 23.3 | | | | | 5.78 | | | | | 24.74 | | | | | |
| -10 | 4.5 x 10-9 |  | 9.0 x 10-9 | (9.0 ag) |  | | | 2.19 x 100 | | |  | | | 16.0 | ND | ND |  | | 16.0 | | | | | - | | | | | - | | | | | |
| -11 | 4.5 x 10-10 |  | 9.0 x 10-10 | (0.90 ag) |  | | | 2.19 x 10-1 | |  | | 11.6 | | | ND | ND |  | | | 11.6 | | | | | - | | | | | - | | | | |
| -12 | 4.5 x 10-11 |  | 9.0 x 10-11 | (0.09 ag) |  | | | 2.19 x 10-2 | |  | | ND | | | ND | ND |  | | | | - | | | | | - | | | | | - | | | |

1, Dilution; 2, Concentration pf plasmid DNA tested; 3, pDNA concentration per reaction; 4, number of genome copies per reaction (calculated from the formula **g**=n/N x GL x ncMW described in M&M); 5, Number of pDNA copies per reaction measured by ddPCR from at least 3 replicas; 6, Average number of copies; 7, Standard Deviation; 8, Coefficient of Variation. NT, Not tested; ND, Not detected

Supplementary Table 2.- Results obtained with ddPCR applied on SJ pDNA – Repeat 2

|  |  |  |  |  |  | |  | | | |  | | | Replica5 | | | | | | | | |  | | | | |  | | | | | | | | | |
| --- | --- | --- | --- | --- | --- | --- | --- | --- | --- | --- | --- | --- | --- | --- | --- | --- | --- | --- | --- | --- | --- | --- | --- | --- | --- | --- | --- | --- | --- | --- | --- | --- | --- | --- | --- | --- | --- |
| Dil1 | ng/µl**2** |  | ng pDNA/rctn**3** | | |  | | | cps/react4 | | |  | | | 1 | | | 2 | 3 | |  | | | | Avrg6 | | | | | | Desv7 | | CV8 | | | |
| -4 | 4.5 x 10-3 |  | 9.0 x 10-3 | (9.0 pg) |  | | | 2.19 x 106 | | |  | | | NT | | NT | | | NT |  | | | | - | | | | | | - | | - | | | |
| -5 | 4.5 x 10-4 |  | 9.0 x 10-4 | (0.90 pg) |  | | | 2.19 x 105 | | |  | | | ND | | ND | | | ND |  | | | | ND | | | | | | - | | | | | - | | | | |
| -6 | 4.5 x 10-5 |  | 9.0 x 10-5 | (90.0 fg) |  | | | 2.19 x 104 | | |  | | | 5320 | | 5180 | | | 5160 |  | | | | 5220.0 | | | | | | 87.18 | | | | | 1.67 | | | | |
| -7 | 4.5 x 10-6 |  | 9.0 x 10-6 | (9.0 fg) |  | | | 2.19 x 103 | | |  | | | 1006 | | 1074 | | | 1008 |  | | | | 1029.3 | | | | | | 38.70 | | | | | 3.76 | | | | |
| -8 | 4.5 x 10-7 |  | 9.0 x 10-7 | (0.90 fg) |  | | | 2.19 x 102 | | |  | | | 78.0 | | 72.0 | | | 90.0 |  | | | | 80.0 | | | | | | 9.17 | | | | | 11.46 | | | | |
| -9 | 4.5 x 10-8 |  | 9.0 x 10-8 | (90.0 ag) |  | | | 2.19 x 101 | | |  | | | 19.3 | | 15.0 | | | 14.9 |  | | | | 16.4 | | | | | | 2.5 | | | | | 15.3 | | | | |
| -10 | 4.5 x 10-9 |  | 9.0 x 10-9 | (9.0 ag) |  | | | 2.19 x 100 | | |  | | | ND | | 13.2 | | | 20.0 |  | | | | 16.6 | | | | | | 4.81 | | | | | 28.97 | | | | |
| -11 | 4.5 x 10-10 |  | 9.0 x 10-10 | (0.90 ag) |  | | | 2.19 x 10-1 | |  | | | ND | | | | ND | | ND | | |  | | | | ND | | | - | | | | | - | | | | |
| -12 | 4.5 x 10-11 |  | 9.0 x 10-11 | (0.09 ag) |  | | | 2.19 x 10-2 | |  | | | NT | | | | NT | | NT | | |  | | | | | - | | - | | | | | - | | | | |

1, Dilution; 2, Concentration pf plasmid DNA tested; 3, pDNA concentration per reaction; 4, number of genome copies per reaction (calculated from the formula **g**=n/N x GL x ncMW described in M&M); 5, Number of pDNA copies per reaction measured by ddPCR from at least 3 replicas; 6, Average number of copies; 7, Standard Deviation; 8, Coefficient of Variation. NT, Not tested; ND, Not detected

Supplementary Table 3.- Results obtained with ddPCR applied on SJ pDNA – Repeat 3

|  |  |  |  |  |  | |  | | | |  | | | Replica5 | | | | | | | | | | |  | | | | |  | | | | | |
| --- | --- | --- | --- | --- | --- | --- | --- | --- | --- | --- | --- | --- | --- | --- | --- | --- | --- | --- | --- | --- | --- | --- | --- | --- | --- | --- | --- | --- | --- | --- | --- | --- | --- | --- | --- |
| Dil1 | ng/µl**2** |  | ng pDNA/rctn**3** | | |  | | | cps/react4 | | |  | | | 1 | | | 2 | | | 3 | | |  | | | Avrg6 | | | | Desv7 | | | CV8 |
| -4 | 4.5 x 10-3 |  | 9.0 x 10-3 | (9.0 pg) |  | | | 2.19 x 106 | | |  | | | NT | | NT | | | NT | | |  | | | | - | | | | | - | | | - |
| -5 | 4.5 x 10-4 |  | 9.0 x 10-4 | (0.90 pg) |  | | | 2.19 x 105 | | |  | | | ND | | ND | | | ND | | |  | | | | ND | | | | | - | | | - | | |
| -6 | 4.5 x 10-5 |  | 9.0 x 10-5 | (90.0 fg) |  | | | 2.19 x 104 | | |  | | | 4138 | | 4838 | | | 4351 | | |  | | | | 4442.3 | | | | | 358.83 | | | 8.08 | | |
| -7 | 4.5 x 10-6 |  | 9.0 x 10-6 | (9.0 fg) |  | | | 2.19 x 103 | | |  | | | 566.0 | | 908 | | | 844.0 | | |  | | | | 772.7 | | | | | 181.82 | | | 23.53 | | |
| -8 | 4.5 x 10-7 |  | 9.0 x 10-7 | (0.90 fg) |  | | | 2.19 x 102 | | |  | | | 58.0 | | 56.0 | | | 84.2 | | |  | | | | 66.1 | | | | | 15.74 | | | 23.82 | | |
| -9 | 4.5 x 10-8 |  | 9.0 x 10-8 | (90.0 ag) |  | | | 2.19 x 101 | | |  | | | 24.0 | | 16.0 | | | 20.0 | | |  | | | | 20.0 | | | | | 4.00 | | | 20.00 | | |
| -10 | 4.5 x 10-9 |  | 9.0 x 10-9 | (9.0 ag) |  | | | 2.19 x 100 | | |  | | | ND | | ND | | | 11.4 | | |  | | | | 14.4 | | | | | - | | | - | | |
| -11 | 4.5 x 10-10 |  | 9.0 x 10-10 | (0.90 ag) |  | | | 2.19 x 10-1 | |  | | | ND | | | | ND | | | ND | | |  | | | | | ND | | | | - | | - | | | | |
| -12 | 4.5 x 10-11 |  | 9.0 x 10-11 | (0.09 ag) |  | | | 2.19 x 10-2 | |  | | | NT | | | | NT | | | NT | | |  | | | | | | - | | | | - | - | | | |

1, Dilution; 2, Concentration pf plasmid DNA tested; 3, pDNA concentration per reaction; 4, number of genome copies per reaction (calculated from the formula **g**=n/N x GL x ncMW described in M&M); 5, Number of pDNA copies per reaction measured by ddPCR from at least 3 replicas; 6, Average number of copies; 7, Standard Deviation; 8, Coefficient of Variation. NT, Not tested; ND, Not detected

Supplementary Table 4.- Results obtained with ddPCR applied on SJ pDNA – Repeat 4

|  |  |  |  |  |  | |  | | | |  | | | Replica5 | | | | | | | | | |  | |  | | | | |
| --- | --- | --- | --- | --- | --- | --- | --- | --- | --- | --- | --- | --- | --- | --- | --- | --- | --- | --- | --- | --- | --- | --- | --- | --- | --- | --- | --- | --- | --- | --- |
| Dil1 | ng/µl2 |  | ng pDNA/rctn**3** | | |  | | | cps/react4 | | |  | | | 1 | 2 | | 3 | | |  | | | | Avrg6 | | Desv7 | CV8 | |
| -4 | 4.5 x 10-3 |  | 9.0 x 10-3 | (9.0 pg) |  | | | 2.19 x 106 | | |  | | | NT | | | NT | | NT |  | | - | | | | | - | - |
| -5 | 4.5 x 10-4 |  | 9.0 x 10-4 | (0.90 pg) |  | | | 2.19 x 105 | | |  | | | ND | | | NT | | NT |  | | ND | | | | | - | - |
| -6 | 4.5 x 10-5 |  | 9.0 x 10-5 | (90.0 fg) |  | | | 2.19 x 104 | | |  | | | 3140 | | | NT | | NT |  | | 3140 | | | | | - | - |
| -7 | 4.5 x 10-6 |  | 9.0 x 10-6 | (9.0 fg) |  | | | 2.19 x 103 | | |  | | | 752 | | | NT | | NT |  | | 752 | | | | | - | - |
| -8 | 4.5 x 10-7 |  | 9.0 x 10-7 | (0.90 fg) |  | | | 2.19 x 102 | | |  | | | 78 | | | NT | | NT |  | | 78 | | | | | - | - |
| -9 | 4.5 x 10-8 |  | 9.0 x 10-8 | (90.0 ag) |  | | | 2.19 x 101 | | |  | | | 22 | | | NT | | NT |  | | 22 | | | | | - | - |
| -10 | 4.5 x 10-9 |  | 9.0 x 10-9 | (9.0 ag) |  | | | 2.19 x 100 | | |  | | | 9.8 | | | NT | | NT |  | | 9.8 | | | | | - | - |
| -11 | 4.5 x 10-10 |  | 9.0 x 10-10 | (0.90 ag) |  | | | 2.19 x 10-1 | | |  | | | ND | | | NT | | NT |  | | ND | | | | | - | - |
| -12 | 4.5 x 10-11 |  | 9.0 x 10-11 | (0.09 ag) |  | | | 2.19 x 10-2 | |  | | | ND | | | NT | | NT | |  | | | ND | | | | - | - |

1, Dilution; 2, Concentration pf plasmid DNA tested; 3, pDNA concentration per reaction; 4, number of genome copies per reaction (calculated from the formula **g**=n/N x GL x ncMW described in M&M); 5, Number of pDNA copies per reaction measured by ddPCR from at least 3 replicas; 6, Average number of copies; 7, Standard Deviation; 8, Coefficient of Variation. NT, Not tested; ND, Not detected

Supplementary Table 5.- Results obtained with ddPCR applied on SJ pDNA – Repeat 5

|  |  |  |  | |  | |  | |  | |  | |  | | Replica5 | | | | | | | | |  | |  | |  | | | | | | | | |
| --- | --- | --- | --- | --- | --- | --- | --- | --- | --- | --- | --- | --- | --- | --- | --- | --- | --- | --- | --- | --- | --- | --- | --- | --- | --- | --- | --- | --- | --- | --- | --- | --- | --- | --- | --- | --- |
| Dil1 | ng/µl2 | ng RNA/rctn3 | cps/react4 | |  | | 1 | 2 | | 3 | | 4 | | 5 | | 6 | 7 | 8 | 9 | 10 | 11 | 12 |  | | Avrg6 | | Desv7 | | | | CV8 | | |
| -5 | 4.5 x 10-4 | 9.0 x 10-4 | 2.19 x 105 | |  | | NT | NT | | NT | | NT | | NT | | NT | NT | NT | NT | NT | NT | NT |  | | NT | | | | - | | | - | | |
| -6 | 4.5 x 10-5 | 9.0 x 10-5 | 2.19 x 104 |  | | 1980 | | NT | | NT | | NT | | NT | | NT | NT | NT | NT | NT | NT | NT |  | | 1980 | | | | | - | | | - | | |
| -7 | 4.5 x 10-6 | 9.0 x 10-6 | 2.19 x 103 |  | | NT | | NT | | NT | | NT | | NT | | NT | NT | NT | NT | NT | NT | NT |  | | NT | | | | | - | | | - | | |
| -8 | 4.5 x 10-7 | 9.0 x 10-7 | 2.19 x 102 |  | | NT | | NT | | NT | | NT | | NT | | NT | NT | NT | NT | NT | NT | NT |  | | NT | | | | | - | | | - | | |
| -9 | 4.5 x 10-8 | 9.0 x 10-8 | 2.19 x 101 |  | | 30.0 | | 31.0 | | 32.0 | | NT | | NT | | NT | NT | NT | NT | NT | NT | NT |  | | 31.0 | | | | | 1.0 | | | 3.2 | | |
| -10 | 4.5 x 10-9 | 9.0 x 10-9 | 2.19 x 100 |  | | ND | | ND | | 6.0 | | ND | | 12.8 | | 4.8 | 24 | ND | ND | 26.9 | 9.4 | ND |  | | 14.0 | | | | | 9.4 | | | 66.9 | | |
| -11 | 4.5 x 10-10 | 9.0 x 10-10 | 2.19 x 10-1 |  | | ND | | ND | | ND | | ND | | ND | | 42 | ND | ND | ND | ND | ND | ND |  | | 42.0 | | | | | - | | | - | | |
| -12 | 4.5 x 10-11 | 9.0 x 10-11 | 2.19 x 10-2 |  | | ND | | NT | | NT | | NT | | NT | | NT | NT | NT | NT | NT | NT | NT |  | | NT | | | | | - | | | - | | |

1, Dilution; 2, Concentration pf plasmid DNA tested; 3, pDNA concentration per reaction; 4, number of genome copies per reaction (calculated from the formula **g**=n/N x GL x ncMW described in M&M); 5, Number of pDNA copies per reaction measured by ddPCR from at least 3 replicas; 6, Average number of copies; 7, Standard Deviation; 8, Coefficient of Variation. NT, Not tested; ND, Not detected
