# Supplementary material for: Designing and Validation of a Droplet Digital PCR Procedure for Diagnosis and Accurate Quantification of Nervous Necrosis Virus
Source: Preprints.org preprint supplement (doi:10.20944/preprints202308.0284.v1), 2023-08-03
Supplement: Supplementary file 2 [file Suppl Table 12-SJ_CV all data-ddPCR y qPCR.docx]

Supplementary Table 12.- Detection of SJNNV crude virus by RT-ddPCR and RT-qPCR

|  |  | |  | |  | | | | | |  | |  | | |  | | | |  | | | | | |  | | | ddPCR (quantification of copies per reaction) | | | | | | | | | | | | | | | | | | | | | | | | | |  | | | | | qPCR (quantification of copies per reaction) | | | | | | | | | | | | | | | | | | | | | | | | | | | | | | | | | | | | |
| --- | --- | --- | --- | --- | --- | --- | --- | --- | --- | --- | --- | --- | --- | --- | --- | --- | --- | --- | --- | --- | --- | --- | --- | --- | --- | --- | --- | --- | --- | --- | --- | --- | --- | --- | --- | --- | --- | --- | --- | --- | --- | --- | --- | --- | --- | --- | --- | --- | --- | --- | --- | --- | --- | --- | --- | --- | --- | --- | --- | --- | --- | --- | --- | --- | --- | --- | --- | --- | --- | --- | --- | --- | --- | --- | --- | --- | --- | --- | --- | --- | --- | --- | --- | --- | --- | --- | --- | --- | --- | --- | --- | --- | --- | --- | --- | --- |
| Concentration of the original sample | | | | | | | | | | | | | | | | | | | | | | |  | | | | | Absolute data | | | | | | | | Replicas9 | | | | | | | | | Data in Lg10 | | | | | | | | |  | | | | | absolute data | | | | | | | | | | | Replicas | | | | | | | | | | | | Data in Lg10 | | | | | | | | | | | | | |
| Dil1 | Titer/ml2 |  | | Titer/react**3** | | | |  | | | | ng RNA/rctn**4** | | |  | | | | cps/react5 | | |  | | | | | Avrg6 | | | | | StdDev7 | | | CV8 | | nr | | + | | | Avrg | | | | | StdDv | | | CV | | |  | | | | | Avrg10 | | | | | Desv | | | CV | | | nr | | | | | | + | | Avrg | | | | | | | StdDv | | | | | | | CV | | | | |
| -1 | 5.6 x 106 |  | | 7.2 x 103 | | |  | | | 0.18 ng | | | | |  | | | 6.8 x 107 | | | |  | | | NT | | | | | | NT | | NT | | | |  | |  | | |  | | | | |  | | |  | | |  | | | | | NT | | | | | NT | | | NT | | |  | | | | | |  | | | | | |  | | | | | | |  | | | | | | |  |
| -2 | 5.6 x 105 |  | | 7.2 x 102 | |  | | | 18 pg | | | | |  | | | 6.8 x 106 | | | |  | | | NT | | | | | | NT | | | | NT | | | |  | |  | | | |  | |  | |  | | |  | | | | | 3.0 x 106 | | | | | 2.4 x 106 | | | 79.09 | | | 3 | | | | 3 | | | | | 6.83 | | | | | | | 0.14 | | | | | | 2.06 | | | | | | |
| -3 | 5.6 x 104 |  | | 7.2 x 101 | |  | | | 1.8 pg | | | | |  | | | 6.8 x 105 | | | |  | | | ND | | | | | | ND | | | | ND | | | | 3 | | 0 |  | | | | |  | |  | | |  | | | | | 3.6 x 105 | | | | | 3.2 x 105 | | | 89.89 | | | 3 | | | | | 3 | | | | | | 5.90 | | | | | | | 0.16 | | | | | 2.68 | | | | | |
| -4 | 5.6 x 103 |  | | 7.2 x 100 | |  | | | 0.18 pg | | | | |  | | | 6.8 x 104 | | | |  | | | 7264.2 | | | | | | 1815.6 | | | | 25.0 | | | | 6 | | 6 | 3.85 | | | | | 0.11 | | 2.76 | | |  | | | | | 3.0 x 104 | | | | | 2.1 x 104 | | | 70.65 | | | 3 | | | | | 3 | | | | | | 4.83 | | | | | | | 0.14 | | | | | 2.93 | | | | | |
| -5 | 5.6 x 102 |  | | 7.2 x 10-1 | |  | | | 18 fg | | | | |  | | | 6.8 x 103 | | | |  | | | 789.3 | | | | | | 23.0 | | | | 2.9 | | | | 3 | | 3 | 2.90 | | | | | 0.01 | | 0.44 | | |  | | | | | 2.5 x 103 | | | | | 1.4 x 103 | | | 54.10 | | | 3 | | | | | 3 | | | | | | 3.76 | | | | | | | 0.10 | | | | | 2.60 | | | | | |
| -6 | 5.6 x 101 |  | | 7.2 x 10-2 | |  | | | 1.8 fg | | | | |  | | | 6.8 x 102 | | | |  | | | 98.0 | | | | | | 17.1 | | | | 17.4 | | | | 3 | | 3 | 1.99 | | | | | 0.08 | | 3.80 | | |  | | | | | 3.3 x 102 | | | | | 5.6 x 102 | | | 167.94 | | | 3 | | | | | 3 | | | | | | 2.68 | | | | | | | 0.59 | | | | | 22.01 | | | | | |
| -7 | 5.6 x 100 |  | | 7.2 x 10-3 | |  | | | 0.18 fg | | | | |  | | | 6.8 x 101 | | | |  | | | 12.2 | | | | | | 3.0 | | | | 24.9 | | | | 7 | | 7 | 1.00 | | | | | 0.11 | | 10.15 | | |  | | | | | 5.8 x 101 | | | | | 2.9 x 101 | | | 49.25 | | | 3 | | | | | 3 | | | | | | 2.00 | | | | | | | 0.12 | | | | | 5.75 | | | | | |
| -8 | 5.6 x 10-1 |  | | 7.2 x 10-4 | |  | | | 18 ag | | | | |  | | | 6.8 x 100 | | | |  | | | 11.0 | | | | | | 3.5 | | | | 32.2 | | | | 15 | | 5 | 1.03 | | | | | 0.20 | | 18.93 | | |  | | | | | ND | | | | | ND | | | ND | | | 3 | | | | | 0 | | | | | | - | | | | | | | - | | | | | | | - | | | |
| -9 | 5.6 x 10-2 |  | | 7.2 x 10-5 | |  | | | 1.8 ag | | | | |  | | | 6.8 x 10-1 | | | |  | | | ND | | | | | | ND | | | | ND | | | | 15 | | 0 |  | | | | |  | |  | | |  | | | | | NT | | | | | NT | | | NT | | |  | | | | | |  | | | | | |  | | | | | | |  | | | | | | |  | | |
| -10 | 5.6 x 10-3 |  | | 7.2 x 10-6 | |  | | | 0.18 ag | | | | |  | | | 6.8 x 10-2 | | | |  | | | NT | | | | | | NT | | | | NT | | | |  | |  | | |  | | | |  | |  | | |  | | | | | NT | | | | | NT | | | NT | | |  | | | | | |  | | | | | |  | | | | | | |  | | | | | | |  | | |

1, Dilution; 2, Viral titer (TCID50/ml) of crude virus (100µl were used for total RNA extraction); 3, Viral titer (TCID50) per reaction (from the 70µl stock RNA, 9µl were used in the 20µl reverse transcription, and from this cDNA 2µl were employed in the 20µl PCR reaction); 4, corresponding ng of RNA used per PCR reaction; 5, number of genome copies per reaction (calculated from the formula **g**=n/N x GL x ncMW described in M&M); 6, Average number of copies measured by RT-ddPCR from at least 3 replicas; 7, Standard Deviation; 8, Coefficient of Variation; 9, number of replicas used (nr) and number of replicas resulting positive PCR (+); 10, Average number of copies deduced from the equation y=-0.3067x+13.010 (Fig 4C). NT, Not tested; ND, Not detected.
