# Supplementary material for: Designing and Validation of a Droplet Digital PCR Procedure for Diagnosis and Accurate Quantification of Nervous Necrosis Virus
Source: Preprints.org preprint supplement (doi:10.20944/preprints202308.0284.v1), 2023-08-03
Supplement: Supplementary file 3 [file Suppl Table 13-SJ_dDNA all data-ddPCR y qPCR.docx]

Supplementary Table 13.- Detection of SJNNV pDNA by ddPCR and qPCR

|  |  |  | | |  |  | |  | | ddPCR (quantification of copies per reaction) | | | | | | | | | | | | | | | | | |  | | | | qPCR (quantification of copies per reaction) | | | | | | | | | | | | | | | | | | | |
| --- | --- | --- | --- | --- | --- | --- | --- | --- | --- | --- | --- | --- | --- | --- | --- | --- | --- | --- | --- | --- | --- | --- | --- | --- | --- | --- | --- | --- | --- | --- | --- | --- | --- | --- | --- | --- | --- | --- | --- | --- | --- | --- | --- | --- | --- | --- | --- | --- | --- | --- | --- |
| Concentration of the original sample | | | | | | | |  | | Absolute data | | | | | | Replicas7 | | | | | | Data in Lg10 | | | | | | | |  | | | | absolute data | | | | | | | Replicas | | | | | Data in Lg10 | | | | | | | |
| Dil1 |  | ng pDNA/rctn2 | | |  | cps/react3 |  | | Avrg4 | | | StdDev5 | | CV6 | | | nr | | + | | Avrg | | | StdDv | | CV | | |  | | | | Avrg8 | | | Desv | | CV | | nr | | | + | | Avrg | | | StdDv | | CV | | |
| -1 |  | 9.0 ng |  | 2.19 x 109 | | | |  | | NT | NT | | NT | | NT | | | NT | | NT | | | NT | | NT | |  | | | | NT | | | | NT | | NT | | NT | | | NT | | NT | | | NT | | NT | |
| -2 |  | 0.9 ng |  | 2.19 x 108 | | | |  | | NT | NT | | NT | | NT | | | NT | | NT | | | NT | | NT | |  | | | | 2.12E+09 | | | | 2.05E+08 | | 9.66 | | 3 | | | 3 | | 9.32 | | | 0.05 | | 0.57 | |
| -3 |  | 90.0 pg |  | 2.19 x 107 | | | |  | | NT | NT | | NT | | NT | | | NT | | NT | | | NT | | NT | |  | | | | 2.44E+08 | | | | 1.30E+08 | | 53.15 | | 3 | | | 3 | | 8.35 | | | 0.28 | | 3.37 | |
| -4 |  | 9.0 pg |  | 2.19 x 106 | | | |  | | NT | NT | | NT | | NT | | | NT | | NT | | | NT | | NT | |  | | | | 2.31E+07 | | | | 5.07E+06 | | 21.89 | | 3 | | | 3 | | 7.36 | | | 0.14 | | 1.87 | |
| -5 |  | 0.9 pg |  | 2.19 x 105 | | | |  | | ND | ND | | ND | | 11 | | | 0 | | ND | | | ND | | ND | |  | | | | 2.71E+06 | | | | 5.70E+05 | | 21.03 | | 3 | | | 3 | | 6.43 | | | 0.10 | | 1.59 | |
| -6 |  | 90.0 fg |  | 2.19 x 104 | | | |  | | 4352.7 | 1049.3 | | 24.1 | | 11 | | | 10 | | 3.62 | | | 0.13 | | 3.7 | |  | | | | 2.23E+05 | | | | 7.33E+04 | | 32.80 | | 3 | | | 3 | | 5.33 | | | 0.18 | | 3.41 | |
| -7 |  | 9.0 fg |  | 2.19 x 103 | | | |  | | 881.8 | 175.2 | | 19.9 | | 10 | | | 9 | | 2.95 | | | 0.10 | | 3.4 | |  | | | | 1.73E+04 | | | | 2.95E+03 | | 17.08 | | 3 | | | 3 | | 4.23 | | | 0.09 | | 2.09 | |
| -8 |  | 0.9 fg |  | 2.19 x 102 | | | |  | | 85.2 | 21.5 | | 25.0 | | 10 | | | 9 | | 1.91 | | | 0.11 | | 5.5 | |  | | | | 2.48E+03 | | | | 3.02E+02 | | 12.16 | | 3 | | | 3 | | 3.39 | | | 0.07 | | 2.09 | |
| -9 |  | 90.0 ag |  | 2.19 x 101 | | | |  | | 22.6 | 5.5 | | 24.3 | | 13 | | | 13 | | 1.35 | | | 0.19 | | 14.1 | |  | | | | 1.79E+02 | | | | 9.31E+01 | | 52.01 | | 3 | | | 3 | | 2.21 | | | 0.14 | | 6.32 | |
| -10 |  | 9.0 ag |  | 2.19 x 100 | | | |  | | 14.0 | 7.1 | | 50.5 | | 23 | | | 11 | | 1.12 | | | 0.28 | | 24.9 | |  | | | | 2.89E+01 | | | | 3.36E+01 | | 115.99 | | 3 | | | 1 | | 1.26 | | | 0.58 | | 46.28 | |
| -11 |  | 0.9 ag |  | 2.19 x 10-1 | | | |  | | 26.8 | 21.5 | | 80.2 | | 23 | | | 2 | | 1.34 | | | 0.40 | | 29.4 | |  | | | | ND | | | | ND | | ND | | 3 | | | 0 | | 0.51 | | | - | | - | |
| -12 |  | 0.09 ag |  | 2.19 x 10-2 | | | |  | | ND | ND | | ND | | 11 | | | 0 | | ND | | | ND | | ND | |  | | | | ND | | | | ND | | ND | | 3 | | | 0 | | ND | | | ND | | ND | |

1, Dilution; 2, pDNA concentration in ng/reaction; 3, pDNA copies per reaction (calculated from the formula **g**=n/N x GL x ncMW described in M&M); 4, Average number of copies measured by ddPCR from at least 3 replicas; 5, Standard Deviation; 6, Coefficient of Variation; 7, number of replicas used (nr) and number of positive replicas (+); 8, Average number of copies deduced from the equation y=-0.3133x+12.533 (Fig 4D). NT, Not tested; ND, Not detected.
