# Supplementary material for: Designing and Validation of a Droplet Digital PCR Procedure for Diagnosis and Accurate Quantification of Nervous Necrosis Virus
Source: Preprints.org preprint supplement (doi:10.20944/preprints202308.0284.v1), 2023-08-03
Supplement: Supplementary file 4 [file Suppl Table 14-RG_CV all data-ddPCR y qPCR.docx]

Supplementary Table 14.- Detection of RGNNV crude virus by RT-ddPCR and RT-qPCR

|  |  | | |  | | |  | | |  | | |  | | | |  | | |  | |  | | | ddPCR (quantification of copies per reaction) | | | | | | | | | | | | | | | | | | |  | | | | qPCR (quantification of copies per reaction) | | | | | | | | | | | | | | | | | | | |
| --- | --- | --- | --- | --- | --- | --- | --- | --- | --- | --- | --- | --- | --- | --- | --- | --- | --- | --- | --- | --- | --- | --- | --- | --- | --- | --- | --- | --- | --- | --- | --- | --- | --- | --- | --- | --- | --- | --- | --- | --- | --- | --- | --- | --- | --- | --- | --- | --- | --- | --- | --- | --- | --- | --- | --- | --- | --- | --- | --- | --- | --- | --- | --- | --- | --- | --- | --- |
| Concentration of the original sample | | | | | | | | | | | | | | | | | | | | | |  | | | Absolute data | | | | | | | Replicas9 | | | | Data in Lg10 | | | | | | |  | | | | absolute data | | | | | | | | Replicas | | | | Data in Lg10 | | | | | | | | | |
| Dil1 | Titer/ml2 | |  | | Titer/react**3** | | | |  | | | ngRNA/rctn4 | | |  | | | cps/react5 | | |  | | | Avrg6 | | | StdDev7 | | CV8 | | nr | | | + | | | | Avrg | StdDv | | CV | | | |  | | | | Avrg10 | | Desv | | CV | | | nr | | + | | Avrg | | | StdDv | | CV | |
| -1 | | 1 x 106 | | | |  | | 1.3 x 103 | | |  | | | 0.26 ng | |  | | | 1.04 x 107 | | | |  | | | NT | | NT | | NT | | | 3 | | 0 | | - | | | - | | - | | | |  | | | | 6.5 x 107 | | 1.1 x 107 | | 10.65 | | | 3 | | | | 3 | 7.99 | | 0.05 | | 0.59 | | |
| -2 | | 1 x 105 | | | |  | | 1.3 x 102 | | |  | | | 26 pg | |  | | | 1.04 x 106 | | | |  | | | ND | | ND | | ND | | | 3 | | 0 | | ND | | | - | | - | | | |  | | | | 5.7 x 106 | | 1.2 x 106 | | 13.89 | | | 3 | | | | 3 | 6.94 | | 0.06 | | 0.89 | | |
| -3 | | 1 x 104 | | | |  | | 1.3 x 101 | | |  | | | 2.6 pg | |  | | | 1.04 x 105 | | | |  | | | 24946.7 | | 2412.5 | | 9.7 | | | 3 | | 3 | | 4.4 | | | 0.0 | | 1.0 | | | |  | | | | 8.6 x 105 | | 1.8 x 105 | | 13.36 | | | 3 | | | | 3 | 6.11 | | 0.06 | | 0.94 | | |
| -4 | | 1 x 103 | | | |  | | 1.3 x 100 | | |  | | | 0.26 pg | |  | | | 1.04 x 104 | | | |  | | | 2880.0 | | 348.7 | | 12.1 | | | 3 | | 3 | | 3.5 | | | 0.1 | | 1.5 | | | |  | | | | 7.1 x 104 | | 1.4 x 104 | | 13.23 | | | 3 | | | | 3 | 5.03 | | 0.06 | | 1.14 | | |
| -5 | | 1 x 102 | | | |  | | 1.3 x 10-1 | | |  | | | 26 fg | |  | | | 1.04 x 103 | | | |  | | | 199.3 | | 42.4 | | 21.3 | | | 3 | | 3 | | 2.3 | | | 0.1 | | 4.3 | | | |  | | | | 7.5 x 103 | | 1.0 x 103 | | 9.14 | | | 3 | | | | 3 | 4.05 | | 0.04 | | 0.98 | | |
| -6 | | 1 x 101 | | | |  | | 1.3 x 10-2 | | |  | | | 2.6 fg | |  | | | 1.04 x 102 | | | |  | | | 31.3 | | 4.2 | | 13.3 | | | 3 | | 3 | | 1.5 | | | 0.1 | | 3.8 | | | |  | | | | 7.1 x 102 | | 1.2 x 102 | | 10.66 | | | 3 | | | | 3 | 3.03 | | 0.05 | | 1.56 | | |
| -7 | | 1 x 100 | | | |  | | 1.3 x 10-3 | | |  | | | 0.26 fg | |  | | | 1.04 x 101 | | | |  | | | 6.3 | | 1.3 | | 21.0 | | | 11 | | 7 | | 0.8 | | | 0.1 | | 11.4 | | | |  | | | | 6.1 x 101 | | 2.3 x 101 | | 24.76 | | | 3 | | | | 3 | 1.96 | | 0.11 | | 5.36 | | |
| -8 | | 1 x 10-1 | | | |  | | 1.3 x 10-4 | | |  | | | 26 a | |  | | | 1.04 x 100 | | | |  | | | 19.3 | | 20.5 | | 106.0 | | | 11 | | 4 | | 1.5 | | | 0.6 | | 40.9 | | | |  | | | | ND | | ND | | ND | | |  | | | |  | - | | - | | - | | |
| -9 | | 1 x 10-2 | | | |  | | 1.3 x 10-5 | | |  | | | 2.6 ag | |  | | | 1.04 x 10-1 | | | |  | | | 18.7 | | 4.5 | | 24.0 | | | 11 | | 4 | | 1.3 | | | 0.1 | | 9.0 | | | |  | | | | NT | | NT | | NT | | |  | | | |  |  | |  | |  | | |
| -10 | | 1 x 10-3 | | | |  | | 1.3 x 10-6 | | |  | | | 0.26 ag | |  | | | 1.04 x 10-2 | | | |  | | | NT | | NT | | NT | | |  | |  | |  | | |  | |  | | | |  | | | | NT | | NT | | NT | | |  | | | |  |  | |  | |  | | |

1, Dilution; 2, Viral titer (TCID50/ml) of crude virus (100µl were used for total RNA extraction); 3, Viral titer (TCID50) per reaction (from the 70µl stock RNA, 9µl were used in the 20µl reverse transcription, and from this cDNA 2µl were employed in the 20µl PCR reaction); 4, corresponding ng of RNA used per PCR reaction; 5, number of genome copies per reaction (calculated from the formula **g**=n/N x GL x ncMW described in M&M); 6, Average number of copies measured by RT-ddPCR from at least 3 replicas; 7, Standard Deviation; 8, Coefficient of Variation; 9, number of replicas used (nr) and number of replicas resulting positive PCR (+); 10, Average number of copies deduced from the equation y=-0.2932x+12.544 (Fig 5C). NT, Not tested; ND, Not detected.
