# Supplementary material for: Designing and Validation of a Droplet Digital PCR Procedure for Diagnosis and Accurate Quantification of Nervous Necrosis Virus
Source: Preprints.org preprint supplement (doi:10.20944/preprints202308.0284.v1), 2023-08-03
Supplement: Supplementary file 5 [file Suppl Table 15-RG_pDNA all data-ddPCR y qPCR.docx]

Supplementary Table 15.- Detection of RGNNV pDNA by ddPCR and qPCR

|  | |  | |  | |  | |  | |  | | ddPCR (quantification of copies per reaction) | | | | | | | | | | | | | | | |  | | | qPCR (quantification of copies per reaction) | | | | | | | | | | | | | | | | | | | | | | | | | | | | | |
| --- | --- | --- | --- | --- | --- | --- | --- | --- | --- | --- | --- | --- | --- | --- | --- | --- | --- | --- | --- | --- | --- | --- | --- | --- | --- | --- | --- | --- | --- | --- | --- | --- | --- | --- | --- | --- | --- | --- | --- | --- | --- | --- | --- | --- | --- | --- | --- | --- | --- | --- | --- | --- | --- | --- | --- | --- | --- | --- | --- | --- |
| Concentration of the original sample | | | | | | | | | |  | | Absolute data | | | | | | Replicas7 | | | | | | Data in Lg10 | | | | | | |  | | | absolute data | | | | | | | | Replicas | | | | | Data in Lg10 | | | | | | | | |
| Dil1 | |  | | ng pDNA/rctn2 | |  | | cps/react3 | |  | | Avrg4 | | StdDev5 | | CV6 | | | nr | | + | | Avrg8 | | StdDv | | CV | | |  | | | Avrg5 | | | Desv | | | CV | | | | nr | | + | | | Avrg | | StdDv | | | CV | | | | | |
| -1 |  | | 4.60 ng | |  | | 9.46 x 108 | |  | | NT | | NT | | NT | | 0 | | | 0 | | NT | | | NT | NT | | |  | | | 6.5 x 108 | | | | | 1.5 x 108 | | | 23.11 | | | NT | | NT | | | 8.81 | | | 1.00 | | | 1.1 | | | |
| -2 |  | | 0.46 ng | |  | | 9.46 x 107 | |  | | NT | | NT | | NT | | 0 | | | 0 | | NT | | | NT | NT | | |  | | | 1.2 x 108 | | | | | 1.3 x 107 | | | 10.81 | | | 3 | | 3 | | | 8.07 | | | 0.05 | | | 0.6 | | | |
| -3 |  | | 46.00 pg | |  | | 9.46 x 106 | |  | | NT | | NT | | NT | | 0 | | | 0 | | NT | | | NT | NT | | |  | | | 1.3 x 107 | | | | | 1.1 x 106 | | | 8.51 | | | 3 | | 3 | | | 7.10 | | | 0.04 | | | 0.5 | | | |
| -4 |  | | 4.60 pg | |  | | 9.46 x 105 | |  | | ND | | ND | | ND | | 3 | | | 0 | | ND | | | ND | ND | | |  | | | 8.6 x 105 | | | | | 8.4 x 104 | | | 9.69 | | | 3 | | 3 | | | 5.93 | | | 0.04 | | | 0.7 | | | |
| -5 |  | | 0.46 pg | |  | | 9.46 x 104 | |  | | 14166.7 | | 3209.4 | | 22.7 | | 3 | | | 3 | | 4.15 | | | 0.1 | 2.5 | | |  | | | 7.6 x 104 | | | | | 9.2 x 103 | | | 12.05 | | | 3 | | 3 | | | 4.88 | | | 0.05 | | | 1.0 | | | |
| -6 |  | | 46.00 fg | |  | | 9.46 x 103 | |  | | 1760.0 | | 174.4 | | 9.92 | | 3 | | | 3 | | 3.25 | | | 0.0 | 1.4 | | |  | | | 1.1 x 104 | | | | | 1.7 x 103 | | | 15.00 | | | 3 | | 3 | | | 4.05 | | | 0.07 | | | 1.6 | | | |
| -7 |  | | 4.60 fg | |  | | 9.46 x 102 | |  | | 238.7 | | 24.2 | | 10.1 | | 3 | | | 3 | | 2.38 | | | 0.0 | 1.8 | | |  | | | 9.7 x 102 | | | | | 1.2 x 102 | | | 12.00 | | | 3 | | 3 | | | 2.98 | | | 0.05 | | | 1.7 | | | |
| -8 |  | | 0.46 fg | |  | | 9.46 x 101 | |  | | 28.7 | | 4.6 | | 16.1 | | 3 | | | 3 | | 1.46 | | | 0.1 | 4.6 | | |  | | | 1.3 x 102 | | | | | 2.0 x 101 | | | 15.36 | | | 3 | | 3 | | | 2.11 | | | 0.06 | | | 3.1 | | | |
| -9 |  | | 46.00 ag | |  | | 9.46 x 100 | |  | | 16.3 | | 3.6 | | 21.7 | | 3 | | | 2 | | 1.21 | | | 0.0 | 3.7 | | |  | | | 9.7 x 100 | | | | | 2.2 x 100 | | | 22.35 | | | 3 | | 3 | | | 0.98 | | | 0.10 | | | 10.5 | | | |
| -10 |  | | 4.60 ag | |  | | 9.46 x 10-1 | |  | | 13.5 | | 4.0 | | 29.5 | | 11 | | | 8 | | 1.13 | | | 0.1 | 12.4 | | |  | | | ND | | | | | - | | | - | | | 3 | | 1 | | | -0.14 | | |  | | | |  | | | | |
| -11 |  | | 0.46 ag | |  | | 9.46 x 10-2 | |  | | 18.0 | |  | |  | | 11 | | | 2 | | 1.26 | | | - | - | | |  | | | NT | | | NT | | | NT | | |  | | |  | |  | | |  | | |  | | | | |

1, Dilution; 2, pDNA concentration in ng/reaction; 3, pDNA copies per reaction (calculated from the formula **g**=n/N x GL x ncMW described in M&M); 4, Average number of copies measured by ddPCR from at least 3 replicas; 5, Standard Deviation; 6, Coefficient of Variation; 7, number of replicas used (nr) and number of positive replicas (+); 8, Average number of copies deduced from the equation y=-0.290x+11.547 (Fig 5D). NT, Not tested; ND, Not detected.
