# Supplementary material for: Designing and Validation of a Droplet Digital PCR Procedure for Diagnosis and Accurate Quantification of Nervous Necrosis Virus
Source: Preprints.org preprint supplement (doi:10.20944/preprints202308.0284.v1), 2023-08-03
Supplement: Supplementary file 6 [file Suppl Tables 10_11- Data-ddPCR-RG-CV-Repts1_2.docx]

Supplementary Table 10.- Results obtained with ddPCR applied on RG crude virus – Repeat 1

|  |  |  |  |  |  |  | |  | |  | | |  | | | Replica7 | | | | | | |  | | |  | | | | | | | | | | | |
| --- | --- | --- | --- | --- | --- | --- | --- | --- | --- | --- | --- | --- | --- | --- | --- | --- | --- | --- | --- | --- | --- | --- | --- | --- | --- | --- | --- | --- | --- | --- | --- | --- | --- | --- | --- | --- | --- |
| Dil1 | Titer2 |  | [RNA] ng/µl**3** | |  | Titer/react**4** | | ng RNA/rctn5 | | cps/react6 | | |  | | | 1 | | 2 | | 3 | |  | | | Avrg 8 | | | Desv9 | | | | CV10 | | | |
| -2 | 1 x 105 |  | 2 x 10-2 | (20.0 pg) |  | 1.3 x 102 | 2.57 x 10-2 | | 1.04 x 106 | | |  | | | ND | | ND | | ND | |  | | | ND | | | ND | | | | ND | | | |
| -3 | 1 x 104 |  | 2 x 10-3 | (2.0 pg) |  | 1.3 x 101 | 2.57 x 10-3 | | 1.04 x 105 | | |  | | | 27420 | | 22600 | | 24820 | |  | | | 24946.7 | | | | | 2412.5 | | | | 9.67 | | | |
| -4 | 1 x 103 |  | 2 x 10-4 | (0.2 pg) |  | 1.3 x 100 | 2.57 x 10-4 | | 1.04 x 104 | | |  | | | 2640 | | 3280 | | 2720 | |  | | | 2880.0 | | | | | 348.7 | | | | 12.11 | | | |
| -5 | 1 x 102 |  | 2 x 10-5 | (20.0 fg) |  | 1.3 x 10-1 | 2.57 x 10-5 | | 1.04 x 103 | | |  | | | 152 | | 212 | | 234 | |  | | | 199.3 | | | | | 42.4 | | | | 21.29 | | | |
| -6 | 1 x 101 |  | 2 x 10-6 | (2.0 fg) |  | 1.3 x 10-2 | 2.57 x 10-6 | | 1.04 x 102 | | |  | | | 28 | | 30 | | 36 | |  | | | 31.3 | | | | | 4.2 | | | | 13.29 | | | |
| -7 | 1 x 100 |  | 2 x 10-7 | (0.2 fg) |  | 1.3 x 10-3 | 2.57 x 10-7 | | 1.04 x 101 | | |  | | | ND | | 7.6 | | ND | |  | | | 7.6 | | | | | 0.0 | | | | 0.00 | | | |
| -8 | 1 x 10-1 |  | 2 x 10-8 | (20.0 ag) |  | 1.3 x 10-4 | 2.57 x 10-8 | | 1.04 x 100 | | |  | | | 9 | | ND | | ND | |  | | | 9 | | | | | - | | | | - | | | |
| -9 | 1 x 10-2 |  | 2 x 10-9 | (2.0 ag) |  | 1.3 x 10-5 | 2.57 x 10-9 | | 1.04 x 10-1 | |  | | | 22 | | | 12.6 | | ND | |  | | | 17.3 | | | | | | 6.65 | | | | 38.42 | | | |
| -10 | 1 x 10-3 |  | 2 x 10-10 | (0.2 ag) |  | 1.3 x 10-6 | 2.57 x 10-10 | | 1.04 x 10-2 | |  | | | NT | | | NT | | NT | |  | | | NT | | | NT | | | | NT | | | |

1, Dilution; 2, Viral titer (TCID50/ml) of crude virus (100µl were used for total RNA extraction); 3, RNA concentration in ng/µl of crude virus; 4, Viral titer (TCID50) per reaction (from the 70µl stock RNA, 9µl were used in the 20µl reverse transcription, and from this cDNA 2µl were employed in the 20µl PCR reaction); 5, corresponding ng of RNA used per PCR reaction; 6, number of genome copies per reaction (calculated from the formula **g**=n/N x GL x ncMW described in M&M); 7, Number of genome copies per reaction measured by RT-ddPCR from 3 replicas 8, Average number of copies; 9, Standard Deviation; 10, Coefficient of Variation. NT, Not tested; ND, Not detected

Supplementary Table 10.- Results obtained with ddPCR applied on RG crude virus – Repeat 2

|  |  |  |  |  |  |  |  |  | |  | | Replica7 | | | | | | | | |  | |  | |  | | | | | | | | |
| --- | --- | --- | --- | --- | --- | --- | --- | --- | --- | --- | --- | --- | --- | --- | --- | --- | --- | --- | --- | --- | --- | --- | --- | --- | --- | --- | --- | --- | --- | --- | --- | --- | --- |
| Dil1 | Titer2 |  | [RNA] ng/µl**3** | |  | Titer/react**4** | ng RNA/rctn5 | cps/react6 | |  | | 1 | 2 | 3 | 4 | 5 | 6 | 7 | 8 |  | | Avrg8 | | Desv9 | | | | CV10 | | |
| -7 | 1 x 100 |  | 2 x 10-7 | (0.2 fg) |  | 1.3 x 10-3 | 2.57 x 10-7 | 1.04 x 101 | |  | | ND | 4.8 | 6.6 | ND | 5.2 | 6.4 | 8.3 | 5.2 |  | | 6.1 | | | | 1.3 | | | 21.4 | | |
| -8 | 1 x 10-1 |  | 2 x 10-8 | (20.0 ag) |  | 1.3 x 10-4 | 2.57 x 10-8 | 1.04 x 100 | |  | | ND | 11 | ND | 7.2 | ND | ND | ND | 50 |  | | 22.7 | | | | 23.7 | | | 104 | | |
| -9 | 1 x 10-2 |  | 2 x 10-9 | (2.0 ag) |  | 1.3 x 10-5 | 2.57 x 10-9 | 1.04 x 10-1 |  | | ND | | ND | ND | 18 | ND | ND | 22 | ND |  | | 20.0 | | | | | 2.8 | | | 14.1 | | |

1, Dilution; 2, Viral titer (TCID50/ml) of crude virus (100µl were used for total RNA extraction); 3, RNA concentration in ng/µl of crude virus; 4, Viral titer (TCID50) per reaction (from the 70µl stock RNA, 9µl were used in the 20µl reverse transcription, and from this cDNA 2µl were employed in the 20µl PCR reaction); 5, corresponding ng of RNA used per PCR reaction; 6, number of genome copies per reaction (calculated from the formula **g**=n/N x GL x ncMW described in M&M); 7, Number of genome copies per reaction measured by RT-ddPCR from 3 replicas 8, Average number of copies; 9, Standard Deviation; 10, Coefficient of Variation. NT, Not tested; ND, Not detected
