# Supplementary material for: Designing and Validation of a Droplet Digital PCR Procedure for Diagnosis and Accurate Quantification of Nervous Necrosis Virus
Source: Preprints.org preprint supplement (doi:10.20944/preprints202308.0284.v1), 2023-08-03
Supplement: Supplementary file 8 [file Suppl Tables 6_7- Data-ddPCR-RG-pDNA-Repts1_2.docx]

Supplementary Table 6.- Results obtained with ddPCR applied on RG pDNA – Repeat 1

|  |  |  | |  | |  | | | |  | |  | | | | | | |  | Replica5 | | | | |  | | |  | | | | | | | | |
| --- | --- | --- | --- | --- | --- | --- | --- | --- | --- | --- | --- | --- | --- | --- | --- | --- | --- | --- | --- | --- | --- | --- | --- | --- | --- | --- | --- | --- | --- | --- | --- | --- | --- | --- | --- | --- |
| Dil1 | ng/µl2 |  | | ng pDNA/rctn**3** | | |  | | cps/react4 | | | | | |  | | | 1 | | | | 2 | | 3 | |  | | | Avrg6 | | Desv7 | | | | CV8 | | | |
| -4 | 2.3 x 10-3 |  | 4.6 x 10-3 | | (4.6 pg) | | |  | | | 9.46 x 105 | | |  | | | ND | | | | ND | | ND | | | |  | | | ND | | ND | ND | | |
| -5 | 2.3 x 10-4 |  | 4.6 x 10-4 | | (0.46 pg) | | |  | | | 9.46 x 104 | | |  | | | 10540 | | | | 15320 | | 16640 | | | |  | | | 14166,7 | | 3209.4 | | 22,65 | | | |
| -6 | 2.3 x 10-5 |  | 4.6 x 10-5 | | (46.0 fg) | | |  | | | 9.46 x 103 | | |  | | | 1560 | | | | 1880 | | 1840 | | | |  | | | 1760.0 | | 174.4 | | 9.91 | | | |
| -7 | 2.3 x 10-6 |  | 4.6 x 10-6 | | (4.6 fg) | | |  | | | 9.46 x 102 | | |  | | | 220 | | | | 230 | | 266 | | | |  | | | 238.7 | | 24.2 | | 10.14 | | | |
| -8 | 2.3 x 10-7 |  | 4.6 x 10-7 | | (0.46 fg) | | |  | | | 9.46 x 101 | | |  | | | 26 | | | | 34 | | 26 | | | |  | | | 28.7 | | 4.6 | | 16.11 | | | |
| -9 | 2.3 x 10-8 |  | 4.6 x 10-8 | | (46.0 ag) | | |  | | | 9.46 x 100 | | |  | | | 19.5 | | | | 12.5 | | 17 | | | |  | | | 16.3 | | 3.55 | | 21.72 | | | |
| -10 | 2.3 x 10-9 |  | 4.6 x 10-9 | | (4.6 ag) | | |  | | | 9.46 x 10-1 | | |  | | | ND | | | | 18 | | ND | | | |  | | | 18,0 | | - | | - | | | |
| -11 | 2.3 x 10-10 |  | 4.6 x 10-10 | | (0.46 ag) | | |  | | | 9.46 x 10-2 | |  | | | NT | | | | | NT | | NT | | | |  | | | NT | | NT | NT | | |

1, Dilution; 2, Concentration pf plasmid DNA tested; 3, pDNA concentration per reaction; 4, number of genome copies per reaction (calculated from the formula **g**=n/N x GL x ncMW described in M&M); 5, Number of pDNA copies per reaction measured by ddPCR from at least 3 replicas; 6, Average number of copies; 7, Standard Deviation; 8, Coefficient of Variation. NT, Not tested; ND, Not detected

Supplementary Table 7.- Results obtained with ddPCR applied on RG pDNA – Repeat 2

|  |  |  |  | |  | | Replica5 | | | | | | | | |  | |  | |  | | | | | | |
| --- | --- | --- | --- | --- | --- | --- | --- | --- | --- | --- | --- | --- | --- | --- | --- | --- | --- | --- | --- | --- | --- | --- | --- | --- | --- | --- |
| Dil1 | ng/µl2 | ng pDNA/rctn3 | cps/react4 | |  | | 1 | 2 | 3 | 4 | 5 | 6 | 7 | 8 |  | | Avrg6 | | Desv7 | | | | CV8 |
| -10 | 2.3 x 10-9 | 4.60 x 10-9 | 9.46 x 10-1 | |  | | 12.6 | 10.8 | 7.4 | ND | 15.0 | 9.8 | 14.0 | 16.0 |  | | 12.2 | | | | 3.1 | | 25.0 | |
| -11 | 2.3 x 10-10 | 4.60 x 10-10 | 9.46 x 10-2 |  | | ND | | ND | ND | ND | ND | ND | ND | 18.0 |  | | 18.0 | | | | |  |  | | |

1, Dilution; 2, Concentration pf plasmid DNA tested; 3, pDNA concentration per reaction; 4, number of genome copies per reaction (calculated from the formula **g**=n/N x GL x ncMW described in M&M); 5, Number of pDNA copies per reaction measured by ddPCR from at least 3 replicas; 6, Average number of copies; 7, Standard Deviation; 8, Coefficient of Variation. NT, Not tested; ND, Not detected
