# Supplementary material for: Designing and Validation of a Droplet Digital PCR Procedure for Diagnosis and Accurate Quantification of Nervous Necrosis Virus
Source: Preprints.org preprint supplement (doi:10.20944/preprints202308.0284.v1), 2023-08-03
Supplement: Supplementary file 9 [file Suppl Tables 8_9- Data-ddPCR-SJ-CV-Repts1_2.docx]

Supplementary Table 8.- Results obtained with ddPCR applied on SJ crude virus – Repeat 1

|  |  |  | |  | |  | |  | | |  | | |  | | |  | | | | | |  | Replica**7** | | | | | | | | | | |  |  | | | | | | | | | | | | | | | |
| --- | --- | --- | --- | --- | --- | --- | --- | --- | --- | --- | --- | --- | --- | --- | --- | --- | --- | --- | --- | --- | --- | --- | --- | --- | --- | --- | --- | --- | --- | --- | --- | --- | --- | --- | --- | --- | --- | --- | --- | --- | --- | --- | --- | --- | --- | --- | --- | --- | --- | --- | --- |
| Dil1 | Titer2 |  | | [RNA] ng/µl**3** | | |  | | Titer/react**4** | | | | ng RNA/rctn5 | | | cps/react6 | |  | | | 1 | | | | 2 | | | | 3 |  | | | Avrg**8** | | | | | | Desv**9** | | | | | CV**10** | | | | |
| -2 | 5.6 x 105 |  | 2 x 10-2 | | (20.0 pg) | |  | | | 7.2 x 102 | | 1.8 x 10-2 | | | 6.8 x 106 | | | |  | | | NT | | | | NT | | NT | | |  | | | NT | | | |  | | | | |  | | | | |
| -3 | 5.6 x 104 |  | 2 x 10-3 | | (2.0 pg) | |  | | | 7.2 x 101 | | 1.8 x 10-3 | | | 6.8 x 105 | | | |  | | | ND | | | | ND | | ND | | |  | | | ND | | | | | | |  | | | | |  | | | | |
| -4 | 5.6 x 103 |  | 2 x 10-4 | | (0.2 pg) | |  | | | 7.2 x 100 | | 1.8 x 10-4 | | | 6.8 x 104 | | | |  | | | 9660 | | | | 7380 | | 9240 | | |  | | | 8760 | | | | | | | 1213.4 | | | | | 13.9 | | | | |
| -5 | 5.6 x 102 |  | 2 x 10-5 | | (20.0 fg) | |  | | | 7.2 x 10-1 | | 1.8 x 10-5 | | | 6.8 x 103 | | | |  | | | 766 | | | | 812 | | 790 | | |  | | | 789.3 | | | | | | | 23.0 | | | | | 2.9 | | | | |
| -6 | 5.6 x 101 |  | 2 x 10-6 | | (2.0 fg) | |  | | | 7.2 x 10-2 | | 1.8 x 10-6 | | | 6.8 x 102 | | | |  | | | 82 | | | | 116 | | 96 | | |  | | | 98.0 | | | | | | | 17.1 | | | | | 17.4 | | | | |
| -7 | 5.6 x 100 |  | 2 x 10-7 | | (0.2 fg) | |  | | | 7.2 x 10-3 | | 1.8 x 10-7 | | | 6.8 x 101 | | | |  | | | 13,2 | | | | 10 | | 8.2 | | |  | | | 10.5 | | | | | | | 2.5 | | | | | 24.2 | | | | |
| -8 | 5.6 x 10-1 |  | 2 x 10-8 | | (20.0 ag) | |  | | | 7.2 x 10-4 | | 1.8 x 10-8 | | | 6.8 x 100 | | | |  | | | 16 | | | | ND | | ND | | |  | | | 16.0 | | | | | | |  | | | | |  | | | | |
| -9 | 5.6 x 10-2 |  | 2 x 10-9 | | (2.0 ag) | |  | | | 7.2 x 10-5 | | 1.8 x 10-9 | | | 6.8 x 10-1 | | |  | | ND | | | | | ND | | ND | | |  | | ND | | | | |  | | | | |  | | | | |
| -10 | 5.6 x 10-3 |  | 2 x 10-10 | | (0.2 ag) | |  | | | 7.2 x 10-6 | | 1.8 x 10-10 | | | 6.8 x 10-2 | | |  | | ND | | | | | ND | | ND | | |  | | ND | | | | | | | |  | | | | |  | | | | |

1, Dilution; 2, Viral titer (TCID50/ml) of crude virus (100µl were used for total RNA extraction); 3, RNA concentration in ng/µl of crude virus; 4, Viral titer (TCID50) per reaction (from the 70µl stock RNA, 9µl were used in the 20µl reverse transcription, and from this cDNA 2µl were employed in the 20µl PCR reaction); 5, corresponding ng of RNA used per PCR reaction; 6, number of genome copies per reaction (calculated from the formula **g**=n/N x GL x ncMW described in M&M); 7, Number of genome copies per reaction measured by RT-ddPCR from 3 replicas 8, Average number of copies; 9, Standard Deviation; 10, Coefficient of Variation. NT, Not tested; ND, Not detected

Supplementary Table 9.- Results obtained with ddPCR applied on SJ crude virus – Repeat 2

|  |  | | | |  | |  | |  | | |  |  | | |  | | | Replica7 | | | | | | | | | | | | | | | | |
| --- | --- | --- | --- | --- | --- | --- | --- | --- | --- | --- | --- | --- | --- | --- | --- | --- | --- | --- | --- | --- | --- | --- | --- | --- | --- | --- | --- | --- | --- | --- | --- | --- | --- | --- | --- |
| Dil1 | Titer2 |  | | [RNA] ng/µl**3** | | | | | |  | Titer/rctn**4** | | | | ng RNA/rctn5 | | cps/react6 | | |  | | 1 | | 2 | | 3 | 4 | 5 | 6 | 7 | 8 | 9 | 10 | 11 | 12 |  | | Avrg8 | | Desv9 | | CV10 |
| -3 | 5.6 x 104 | |  | | | 2 x 10-3 | | (2.0 pg) | |  | 7.2 x 101 | | | 1.8 x 10-3 | | 6.8 x 105 | |  | | | NT | | NT | | NT | | NT | NT | NT | NT | NT | NT | NT | NT | NT | |  | | - | | - | - | |
| -4 | 5.6 x 103 | |  | | | 2 x 10-4 | | (0.2 pg) | |  | 7.2 x 100 | | | 1.8 x 10-4 | | 6.8 x 104 | |  | | | 6020 | | 5735 | | 5550 | | NT | NT | NT | NT | NT | NT | NT | NT | NT | |  | | 5768.3 | | 236.8 | 4.1 | |
| -5 | 5.6 x 102 | |  | | | 2 x 10-5 | | (20.0 fg) | |  | 7.2 x 10-1 | | | 1.8 x 10-5 | | 6.8 x 103 | |  | | | NT | | NT | | NT | | NT | NT | NT | NT | NT | NT | NT | NT | NT | |  | | - | | - | - | |
| -6 | 5.6 x 101 | |  | | | 2 x 10-6 | | (2.0 fg) | |  | 7.2 x 10-2 | | | 1.8 x 10-6 | | 6.8 x 102 | |  | | | NT | | NT | | NT | | NT | NT | NT | NT | NT | NT | NT | NT | NT | |  | | - | | - | - | |
| -7 | 5.6 x 100 | |  | | | 2 x 10-7 | | (0.2 fg) | |  | 7.2 x 10-3 | | | 1.8 x 10-7 | | 6.8 x 101 | |  | | | 12.3 | | 16.6 | | 13.4 | | 9.8 | NT | NT | NT | NT | NT | NT | NT | NT | |  | | 13.0 | | 2,8 | 21.6 | |
| -8 | 5.6 x 10-1 | |  | | | 2 x 10-8 | | (20.0 ag) | |  | 7.2 x 10-4 | | | 1.8 x 10-8 | | 6.8 x 100 | |  | | | ND | | 13.3 | | 10.8 | | ND | ND | ND | ND | 8.8 | 5.8 | 11.1 | ND | ND | |  | | 10.0 | | 2.8 | 28.3 | |
| -9 | 5.6 x 10-2 | |  | | | 2 x 10-9 | | (2.0 ag) | |  | 7.2 x 10-5 | | | 1.8 x 10-9 | | 6.8 x 10-1 | |  | | | ND | | ND | | ND | | ND | ND | ND | ND | ND | ND | ND | ND | ND | |  | | - | | - | - | |
| -10 | 5.6 x 10-3 | |  | | | 2 x 10-9 | | (2.0 ag) | |  | 7.2 x 10-6 | | | 1.8 x 10-10 | | 6.8 x 10-2 | |  | | | NT | | NT | | NT | | NT | NT | NT | NT | NT | NT | NT | NT | NT | |  | |  | |  |  | |

1, Dilution; 2, Viral titer (TCID50/ml) of crude virus (100µl were used for total RNA extraction); 3, RNA concentration in ng/µl of crude virus; 4, Viral titer (TCID50) per reaction (from the 70µl stock RNA, 9µl were used in the 20µl reverse transcription, and from this cDNA 2µl were employed in the 20µl PCR reaction); 5, corresponding ng of RNA used per PCR reaction; 6, number of genome copies per reaction (calculated from the formula **g**=n/N x GL x ncMW described in M&M); 7, Number of genome copies per reaction measured by RT-ddPCR from 3 replicas 8, Average number of copies; 9, Standard Deviation; 10, Coefficient of Variation. NT, Not tested; ND, Not detected
